# Supplementary material for: Ultrastructural evidence of a mechanosensory function of scale organs (sensilla) in sea snakes (Hydrophiinae)
Source: R Soc Open Sci. 2019 Apr 10;6(4):182022. doi: 10.1098/rsos.182022 (PMC6502359; doi:10.1098/rsos.182022)
Supplement: Raw data of measurements of snake skin and Table S1 [file rsos182022supp2.xlsx]

## Sheet: Histology measurements
Species	Location	Scale name	Slide number	Index	Type Name	Skin structure	Cell types	Measurement	Number of cells DC)	Distance from sensilla um	Title	Details	Annotation X (pixels)	Annotation Y (pixels)	Length (¬µm)	Area (¬µm¬≤)
Alaevis	Head	Supralabial6	3b	0	Ruler	dermis		length			DERMIS		-95471	3382	289.053
Alaevis	Head	Supralabial6	3b	1	Ruler	dermis		length			DERMIS2		-95762	6075	179.136
Alaevis	Head	Supralabial6	3b	2	Ruler	dermis		length			DERMIS3		-93817	-759	319.77
Alaevis	Head	Supralabial6	3b	3	Ruler	dermis		length			DERMIS4		92935	8013	169.58
Alaevis	Head	Supralabial6	3b	4	Ruler	dermis		length			DERMIS5		94114	941	313.726
Alaevis	Head	Supralabial6	3b	5	Ruler	dermis		length			DERMIS6		96452	-3976	347.929
Alaevis	Head	Supralabial6	6	21	Ruler	dermis		length			Dermis1		-77211	-2222	383.66
Alaevis	Head	Supralabial6	6	22	Ruler	dermis		length			Dermis2		-80180	3476	226.818
Alaevis	Head	Supralabial6	6	23	Ruler	dermis		length			Dermis 3		-80975	6015	129.949
Hstokesii	head	nasal_scale	30	1	Freehand Region	pacinian	lamellar	area			PC1 Area		22136	-3636	63.6151	305.327
Hstokesii	head	nasal_scale	30	2	Ruler	pacinian	lamellar	length			PC1 length		22139	-3636	19.375
Hstokesii	head	nasal_scale	30	3	Ruler	pacinian	lamellar	diameter			PC1 diameter		22140	-3638	16.0879
Hstokesii	head	nasal_scale	30	4	Ruler	pacinian	lamellar	depth			PC distance from epidermis		21956	-3669	61.1838
Hstokesii	head	nasal_scale	30	5	Freehand Region	pacinian	lamellar	area			PC2 area		22755	-5217	74.5407	424.216
Hstokesii	head	nasal_scale	30	6	Ruler	pacinian	lamellar	length			PC2 length		22760	-5217	20.5319
Hstokesii	head	nasal_scale	30	7	Ruler	pacinian	lamellar	diameter			PC2 diameter		22756	-5217	24.5755
Hstokesii	head	nasal_scale	30	8	Ruler	pacinian	lamellar	depth			PC2 distance from epidermis		22456	-5347	123.059
Alaevis	Head	Supralabial6	3a	89	Pointer	pacinian	lamellar	area			Pacinian corpuscle		-96287	7184
Hstokesii	head	nasal_scale	10	17	Ruler	pacinian	lamellar	diameter			PC diam		21982	6339	14.3742
Hstokesii	head	nasal_scale	20	16	Ruler	pacinian	lamellar	diameter			PC diameter		-23738	9633	19.3382
Alaevis	Head	Supralabial6	1	32	Freehand Region	pacinian	lamellar	area			PC		-87722	7241	107.94	891.621
Hstokesii	head	nasal_scale	20	25	Ruler	pacinian	lamellar	depth			PC distance in dermis	Legth from basement membrane in epidermis to corpuscle	-24006	9641	99.797
Alaevis	Head	Supralabial6	2	59	Freehand Region	pacinian	lamellar	area			PC area		-38130	-5863	87.0944	562.124
Hstokesii	head	nasal_scale	10	16	Ruler	pacinian	lamellar	length			PC length		21980	6332	27.1559
Hstokesii	head	nasal_scale	20	15	Ruler	pacinian	lamellar	length			PC length		-23742	9625	23.8958
Hstokesii	head	nasal_scale	10	0	Freehand Region	pacinian	lamellar	area			PC1 area		-72950	11632	77.4465	440.904
Hstokesii	head	nasal_scale	14	14	Freehand Region	pacinian	lamellar	area			PC1 area		-71938	-1473	61.192	270.269
Hstokesii	head	nasal_scale	26	24	Freehand Region	pacinian	lamellar	area			PC1 area		-78012	5052	58.7852	253.995
Hstokesii	head	nasal_scale	35	11	Freehand Line	pacinian	lamellar	area			PC1 area	Adjacent to sensilla2	73858	1915	107.902
Hstokesii	head	nasal_scale	40	0	Freehand Region	pacinian	lamellar	area			PC1 area		77685	3877	82.9012	514.867
Hstokesii	head	nasal_scale	54	0	Freehand Region	pacinian	lamellar	area			PC1 area	PC adjacent to sensilla	-81886	6084	81.1215	503.735
Hstokesii	head	nasal_scale	14	16	Ruler	pacinian	lamellar	diameter			PC1 diam		-71939	-1476	21.6624
Hstokesii	head	nasal_scale	26	26	Ruler	pacinian	lamellar	diameter			PC1 diam		-78012	5055	14.4951
Hstokesii	head	nasal_scale	35	13	Ruler	pacinian	lamellar	diameter			PC1 diam		73864	1918	26.9546
Hstokesii	head	nasal_scale	40	2	Ruler	pacinian	lamellar	diameter			PC1 diam		77688	3874	24.8418
Hstokesii	head	nasal_scale	54	2	Ruler	pacinian	lamellar	diameter			PC1 diam		-81884	6091	25.3906
Hstokesii	head	nasal_scale	10	2	Ruler	pacinian	lamellar	diameter			PC1 diameter		-72950	11640	19.4508
Hstokesii	head	nasal_scale	10	3	Ruler	pacinian	lamellar	depth			PC1 distance from epidermis		-73222	11629	102.475
Hstokesii	head	nasal_scale	14	17	Ruler	pacinian	lamellar	depth			PC1 distance from epidermis		-72155	-1536	82.2597
Hstokesii	head	nasal_scale	26	27	Ruler	pacinian	lamellar	depth			PC1 distance from epidermis		-78215	5030	73.0767
Hstokesii	head	nasal_scale	35	14	Ruler	pacinian	lamellar	depth			PC1 distance from epidermis		73626	1921	78.8043
Hstokesii	head	nasal_scale	40	3	Ruler	pacinian	lamellar	depth			PC1 distance from epidermis		77488	3836	69.3672
Hstokesii	head	nasal_scale	54	3	Ruler	pacinian	lamellar	depth			PC1 distance from epidermsi		-82156	6121	98.2175
Hstokesii	head	nasal_scale	10	1	Ruler	pacinian	lamellar	length			PC1 length		-72954	11633	27.0545
Hstokesii	head	nasal_scale	14	15	Ruler	pacinian	lamellar	length			PC1 length		-71934	-1484	14.0545
Hstokesii	head	nasal_scale	26	25	Ruler	pacinian	lamellar	length			PC1 length		-78009	5054	20.4238
Hstokesii	head	nasal_scale	35	12	Ruler	pacinian	lamellar	length			PC1 length		73856	1918	36.5463
Hstokesii	head	nasal_scale	40	1	Ruler	pacinian	lamellar	length			PC1 length		77693	3878	25.4689
Hstokesii	head	nasal_scale	54	1	Ruler	pacinian	lamellar	length			PC1 length		-81886	6082	21.7047
Hstokesii	head	nasal_scale	10	19	Freehand Region	pacinian	lamellar	area			PC2 area		21971	5609	56.3828	239.154
Hstokesii	head	nasal_scale	14	18	Freehand Region	pacinian	lamellar	area			PC2 area		-73305	12647	63.3133	302.789
Hstokesii	head	nasal_scale	20	26	Freehand Region	pacinian	lamellar	area			PC2 area		-21837	-5089	68.274	353.409
Hstokesii	head	nasal_scale	26	28	Freehand Region	pacinian	lamellar	area			PC2 area		-75463	-6162	70.289	365.062
Hstokesii	head	nasal_scale	35	24	Freehand Region	pacinian	lamellar	area			PC2 area		23349	-4999	85.7236	453.063
Hstokesii	head	nasal_scale	10	21	Ruler	pacinian	lamellar	diameter			PC2 diam		21973	5607	16.2266
Hstokesii	head	nasal_scale	14	20	Ruler	pacinian	lamellar	diameter			pc2 DIAM		-73306	12648	21.0004
Hstokesii	head	nasal_scale	26	30	Ruler	pacinian	lamellar	diameter			PC2 diam		-75463	-6161	24.92
Hstokesii	head	nasal_scale	35	26	Ruler	pacinian	lamellar	diameter			PC2 diam		23351	-4999	17.0667
Hstokesii	head	nasal_scale	20	28	Ruler	pacinian	lamellar	diameter			PC2 diameter		-21835	-5089	21.296
Hstokesii	head	nasal_scale	20	29	Ruler	pacinian	lamellar	depth			PC2 distance from EP		-22051	-5100	79.2221
Hstokesii	head	nasal_scale	10	22	Ruler	pacinian	lamellar	depth			PC2 distance from epidermis		21758	5608	81.1877
Hstokesii	head	nasal_scale	14	21	Ruler	pacinian	lamellar	depth			PC2 distance from epidermis		-73605	12743	121.908
Hstokesii	head	nasal_scale	35	27	Ruler	pacinian	lamellar	depth			PC2 distance from epidermis		23127	-5005	83.1127
Hstokesii	head	nasal_scale	26	31	Ruler	pacinian	lamellar	depth			PC2 distance from epiderms		-75726	-6268	105.797
Hstokesii	head	nasal_scale	20	27	Ruler	pacinian	lamellar	length			PC2 height		-21835	-5092	17.9151
Hstokesii	head	nasal_scale	10	20	Ruler	pacinian	lamellar	length			PC2 length		21976	5610	15.6727
Hstokesii	head	nasal_scale	14	19	Ruler	pacinian	lamellar	length			PC2 length		-73304	12647	17.677
Hstokesii	head	nasal_scale	26	29	Ruler	pacinian	lamellar	length			PC2 length		-75464	-6160	19.7161
Hstokesii	head	nasal_scale	35	25	Ruler	pacinian	lamellar	length			PC2 length		23350	-5002	32.3331
Hstokesii	head	nasal_scale	10	15	Freehand Region	pacinian	lamellar	area			PC3 area	located adjacent to pit dermal capsule	21980	6333	75.817	379.615
Hstokesii	head	nasal_scale	14	33	Freehand Region	pacinian	lamellar	area			PC3 area		-24385	7338	69.6652	365.97
Hstokesii	head	nasal_scale	26	32	Freehand Region	pacinian	lamellar	area			PC3 area		-75544	-5698	122.684	739.548
Hstokesii	head	nasal_scale	35	28	Freehand Region	pacinian	lamellar	area			PC3 area		23142	-4065	80.4593	457.5
Hstokesii	head	nasal_scale	14	35	Ruler	pacinian	lamellar	diameter			PC3 diam		-24383	7334	20.5094
Hstokesii	head	nasal_scale	26	34	Ruler	pacinian	lamellar	diameter			PC3 diam		-75551	-5709	15.9076
Hstokesii	head	nasal_scale	35	30	Ruler	pacinian	lamellar	diameter			PC3 diam		23135	-4063	15.7934
Hstokesii	head	nasal_scale	30	32	Freehand Region	pacinian	lamellar	area			PC3 area	nerve bundles associated	20222	6165	86.7393	508.84
Hstokesii	head	nasal_scale	10	18	Ruler	pacinian	lamellar	depth			PC3 distance from epidermis		21783	6311	72.9583
Hstokesii	head	nasal_scale	14	36	Ruler	pacinian	lamellar	depth			PC3 distance from epidermis		-24597	7331	76.2327
Hstokesii	head	nasal_scale	26	35	Ruler	pacinian	lamellar	depth			PC3 distance from epidermis		-75860	-5707	107.066
Hstokesii	head	nasal_scale	30	33	Ruler	pacinian	lamellar	length			PC3 height		20219	6163	33.0332
Hstokesii	head	nasal_scale	35	31	Ruler	pacinian	lamellar	depth			PC3 distance from epidermis		22936	-4017	67.4895
Hstokesii	head	nasal_scale	30	34	Ruler	pacinian	lamellar	diameter			PC3 diameter		20223	6163	17.658
Hstokesii	head	nasal_scale	14	34	Ruler	pacinian	lamellar	length			pc3 LENGTH		-24388	7341	21.2522
Hstokesii	head	nasal_scale	26	33	Ruler	pacinian	lamellar	length			PC3 length		-75543	-5698	52.3437
Hstokesii	head	nasal_scale	35	29	Ruler	pacinian	lamellar	length			PC3 length		23146	-4069	28.2763
Hstokesii	head	nasal_scale	10	23	Freehand Region	pacinian	lamellar	area			PC4 area		22343	-3709	95.7003	696.437
Hstokesii	head	nasal_scale	26	36	Freehand Region	pacinian	lamellar	area			PC4 area		21476	9468	86.9794	555.934
Hstokesii	head	nasal_scale	30	35	Ruler	pacinian	lamellar	depth			PC3 distance from epidermis		19992	6069	90.6603
Hstokesii	head	nasal_scale	10	26	Ruler	pacinian	lamellar	diameter			PC4 diam		22342	-3694	27.2604
Hstokesii	head	nasal_scale	26	38	Ruler	pacinian	lamellar	diameter			PC4 diam		21475	9470	24.6265
Hstokesii	head	nasal_scale	30	36	Freehand Region	pacinian	lamellar	diameter			PC4 area		69846	8375	73.9646	353.168
Hstokesii	head	nasal_scale	10	27	Ruler	pacinian	lamellar	depth			PC4 distance from epidermis		22019	-3683	118.893
Hstokesii	head	nasal_scale	26	39	Ruler	pacinian	lamellar	depth			PC4 distance from epidermis		21154	9472	123.612
Hstokesii	head	nasal_scale	30	37	Ruler	pacinian	lamellar	length			PC4 length		69840	8374	26.6238
Hstokesii	head	nasal_scale	10	25	Ruler	pacinian	lamellar	length			PC4 length		22351	-3710	32.5902
Hstokesii	head	nasal_scale	26	37	Ruler	pacinian	lamellar	length			PC4 length		21484	9465	29.3928
Hstokesii	head	nasal_scale	30	38	Ruler	pacinian	lamellar	diameter			PC4 diameter		69847	8375	14.7807
Hstokesii	head	nasal_scale	10	24	Freehand Region	pacinian	lamellar	area			PC5 area		22408	-4325	189.844	1568.26
Hstokesii	head	nasal_scale	30	39	Ruler	pacinian	lamellar	depth			PC4 distance from epidermis		69607	8297	92.5785
Hstokesii	head	nasal_scale	10	29	Ruler	pacinian	lamellar	diameter			PC5 diam		22414	-4334	18.5344
Hstokesii	head	nasal_scale	30	40	Freehand Region	pacinian	lamellar	area			PC5 area	associated with a nerve bundle	69941	9012	130.052	885.114
Hstokesii	head	nasal_scale	10	30	Ruler	pacinian	lamellar	depth			PC5 distance from epidermis		22078	-4306	118.863
Hstokesii	head	nasal_scale	30	41	Ruler	pacinian	lamellar	length			PC5 length		69942	9008	49.8983
Hstokesii	head	nasal_scale	10	28	Ruler	pacinian	lamellar	length			PC5 length		22400	-4328	79.9928
Hstokesii	head	nasal_scale	30	42	Ruler	pacinian	lamellar	diameter			PC5 diameter		69947	9027	17.4603
Hstokesii	head	nasal_scale	20	14	Freehand Region	pacinian	lamellar	area			Pcorpuscle	Area	-23742	9627	71.9254	389.36
Hstokesii	head	nasal_scale	30	43	Ruler	pacinian	lamellar	depth			PC5 distance from epidermis		69602	8996	104.523
Alaevis	Head	Supralabial6	2	63	Freehand Region	pacinian	lamellar	area			PC2 area		2842	200	86.7397	562.057
Alaevis	Head	Supralabial6	2	70	Freehand Region	pacinian	lamellar	area			PC3 area		-78915	-2305	112.998	916.706
Alaevis	Head	Supralabial6	3a	27	Freehand Region	pacinian	lamellar	area			PC area		58218	-2661	87.4129	524.052
Alaevis	Head	Supralabial6	3b	129	Freehand Region	pacinian	lamellar	area			PC area		-55051	-5363	75.0841	432.279
Alaevis	Head	Supralabial6	3b	133	Freehand Region	pacinian	lamellar	area			PC2 area		52252	6811	81.7293	485.144
Alaevis	Head	Supralabial6	6	24	Freehand Region	pacinian	lamellar	area			PC area		40315	-1974	80.2367	480.977
Alaevis	Head	Supralabial6	7	37	Freehand Region	pacinian	lamellar	area			PC area		-15046	-780	70.7584	379.767
Alaevis	Head	Supralabial6	7	41	Freehand Region	pacinian	lamellar	area			PC2 area		89220	-10701	259.897	2552.05
Alaevis	Head	Supralabial6	1	33	Ruler	pacinian	lamellar	depth			distance from epidermis		-87956	7235	69.7577
Alaevis	Head	Supralabial6	2	62	Ruler	pacinian	lamellar	depth			distance from epidermis		-38436	-6042	138.804
Alaevis	Head	Supralabial6	2	66	Ruler	pacinian	lamellar	depth			PC2 distance from epidermis		2509	-61	168.238
Alaevis	Head	Supralabial6	2	73	Ruler	pacinian	lamellar	depth			PC3 distance from epidermis		-79280	-2464	139.864
Alaevis	Head	Supralabial6	3a	30	Ruler	pacinian	lamellar	depth			PC distance from epidermis		57964	-2813	108.594
Alaevis	Head	Supralabial6	3b	127	Ruler	pacinian	lamellar	depth			PC distance from epidermis		-96660	7283	115.399
Alaevis	Head	Supralabial6	3b	132	Ruler	pacinian	lamellar	depth			distance from epidermis		-55388	-5548	150.379
Alaevis	Head	Supralabial6	3b	136	Ruler	pacinian	lamellar	depth			distance from epidermis		51953	6928	123.935
Alaevis	Head	Supralabial6	6	27	Ruler	pacinian	lamellar	depth			distance from epidermis		39991	-2165	143.289
Alaevis	Head	Supralabial6	7	40	Ruler	pacinian	lamellar	depth			distance from epidermis		-15211	-789	52.5675
Alaevis	Head	Supralabial6	7	44	Ruler	pacinian	lamellar	depth			PC2 distance from epidermis		89005	-10928	84.8539
Alaevis	Head	Supralabial6	3a	90	Ruler	pacinian	lamellar	diameter			PC diameter	Pacinian corpuscle	-96335	7256	29.6691
Alaevis	Head	Supralabial6	1	35	Ruler	pacinian	lamellar	diameter			PC diam		-87719	7238	35.101
Alaevis	Head	Supralabial6	2	61	Ruler	pacinian	lamellar	diameter			PC diam		-38129	-5859	23.6893
Alaevis	Head	Supralabial6	2	65	Ruler	pacinian	lamellar	diameter			PC2 diam		2844	199	23.7045
Alaevis	Head	Supralabial6	2	72	Ruler	pacinian	lamellar	diameter			PC3 diam		-78919	-2311	29.0599
Alaevis	Head	Supralabial6	3a	29	Ruler	pacinian	lamellar	diameter			PC diam		58221	-2667	19.7406
Alaevis	Head	Supralabial6	3b	131	Ruler	pacinian	lamellar	diameter			PC diam		-55047	-5362	21.6272
Alaevis	Head	Supralabial6	3b	135	Ruler	pacinian	lamellar	diameter			PC diam		52256	6810	21.0088
Alaevis	Head	Supralabial6	6	26	Ruler	pacinian	lamellar	diameter			PC diam		40319	-1983	21.2887
Alaevis	Head	Supralabial6	7	39	Ruler	pacinian	lamellar	diameter			PC diam		-15046	-782	19.8963
Alaevis	Head	Supralabial6	7	43	Ruler	pacinian	lamellar	diameter			PC2 diam		89239	-10744	27.3112
Alaevis	Head	Supralabial6	3a	91	Ruler	pacinian	lamellar	length			PC height		-96347	7255	29.6726
Alaevis	Head	Supralabial6	1	34	Ruler	pacinian	lamellar	length			PC length		-87731	7236	30.4533
Alaevis	Head	Supralabial6	2	60	Ruler	pacinian	lamellar	length			PC length		-38130	-5865	27.5978
Alaevis	Head	Supralabial6	2	64	Ruler	pacinian	lamellar	length			PC2 length		2845	198	31.1529
Alaevis	Head	Supralabial6	2	71	Ruler	pacinian	lamellar	length			PC3 length		-78910	-2313	40.1731
Alaevis	Head	Supralabial6	3a	28	Ruler	pacinian	lamellar	length			PC length		58219	-2662	32.1684
Alaevis	Head	Supralabial6	3b	130	Ruler	pacinian	lamellar	length			PC length		-55046	-5365	21.2568
Alaevis	Head	Supralabial6	3b	134	Ruler	pacinian	lamellar	length			PC length		52247	6811	30.2462
Alaevis	Head	Supralabial6	6	25	Ruler	pacinian	lamellar	length			PC length		40314	-1977	28.0347
Alaevis	Head	Supralabial6	7	38	Ruler	pacinian	lamellar	length			PC length		-15041	-785	19.6061
Alaevis	Head	Supralabial6	7	42	Ruler	pacinian	lamellar	length			PC2 length		89221	-10711	112.851
Alaevis	Head	Supralabial6	3a	12	Ruler	sensilla	cap_cells	length		100	EPS1		-59362	2563	20.4476
Alaevis	Head	Supralabial6	3a	32	Ruler	sensilla	cap_cells	length		100	EPS1		-93376	-5613	19.2366
Alaevis	Head	Supralabial6	7	9	Ruler	sensilla	epidermis	length		100	EPL 1		11661.4	-336.14	29.5782
Alaevis	Head	Supralabial6	7	28	Ruler	sensilla	epidermis	length		100	EPL 1		29294	-1392.72	32.9395
Alaevis	Head	Supralabial6	7	10	Ruler	sensilla	epidermis	length		200	EPL 2		11628.7	-238.814	30.9112
Alaevis	Head	Supralabial6	7	29	Ruler	sensilla	epidermis	length		200	EPL 2		29251.6	-1298.43	30.2046
Alaevis	Head	Supralabial6	10	8	Ruler	sensilla	epidermis	length		200	EPL 2		-8659.72	-29.021	28.7702
Alaevis	Head	Supralabial6	7	18	Ruler	sensilla	epidermis	length		300	EPL 3		17382.5	-93.516	28.1637
Alaevis	Head	Supralabial6	3b	6	Freehand Region	sensilla	dermal_capsule	area			DC1		54455	7879	150.682	1089.17
Hstokesii	head	nasal_scale	1	0	Freehand Line	sensilla	dermal_capsule	area	10		S1 A	10 cells Looks like a blood vessel leads to sensilla	71977	-9943	85.2191
Hstokesii	head	nasal_scale	14	0	Freehand Region	sensilla	dermal_capsule	area	7		S1 DC area	7 central cells	-72478	-1360	110.334	725.556
Hstokesii	head	nasal_scale	26	0	Freehand Region	sensilla	dermal_capsule	area	10		S1 DC area	10 cells Dermal capsule does not push up epidermis and not located at bottom of pit	-78299	8806	101.165	723.888
Hstokesii	head	nasal_scale	35	0	Freehand Region	sensilla	dermal_capsule	area	16		S1 DC area	16 cells	-80481	8831	152.785	1208.31
Hstokesii	head	nasal_scale	40	4	Freehand Region	sensilla	dermal_capsule	area	4		S1 DC area	4 cells	77233	4001	113.491	867.654
Hstokesii	head	nasal_scale	54	4	Freehand Region	sensilla	dermal_capsule	area			S1 DC area		-82404	6356	114.667	775.532
Hstokesii	head	nasal_scale	20	17	Freehand Region	sensilla	dermal_capsule	area	8		S2 area	8 central cells	-24292	10229	97.1477	615.225
Hstokesii	head	nasal_scale	14	22	Freehand Region	sensilla	dermal_capsule	area	6		S2 DC area	6 cells	-24801	7843	99.5245	635.441
Hstokesii	head	nasal_scale	26	12	Freehand Region	sensilla	dermal_capsule	area	6		S2 DC area	6 CELLS DC did not push up epidermis and not obviously associated with pit	-77735	3164	74.1189	359.393
Hstokesii	head	nasal_scale	35	15	Freehand Region	sensilla	dermal_capsule	area	12		S2 DC area	12 cells	73447	1790	115.207	941.911
Alaevis	Head	Supralabial6	3a	11	Freehand Line	sensilla	dermal_capsule	area			SA		-59211	2558	155.135
Alaevis	Head	Supralabial6	1	0	Circle	sensilla	dermal_capsule	area			SA		-12462	-5382	20.404	1307.92
Alaevis	Head	Supralabial6	3a	31	Freehand Region	sensilla	dermal_capsule	area			SA_2		-93231	-5570	145.988	1337.62
Alaevis	Head	Supralabial6	2	29	Freehand Region	sensilla	dermal_capsule	area			SA_2		39816	1720	118.032	1048.45
Alaevis	Head	Supralabial6	3a	51	Freehand Region	sensilla	dermal_capsule	area			SA_3		-22787	8471	120.991	728.532
Alaevis	Head	Supralabial6	3a	74	Freehand Region	sensilla	dermal_capsule	area			SA_4		19312	-8496	137.411	1049.83
Hstokesii	head	nasal_scale	20	4	Freehand Region	sensilla	dermal_capsule	area	6		SA1	6 cells	-24151	11686	99.2248	634.663
Alaevis	Head	Supralabial6	6	0	Freehand Region	sensilla	dermal_capsule	area			SA1		-80097	1692	97.1084	710.908
Alaevis	Head	Supralabial6	2	0	Freehand Region	sensilla	dermal_capsule	area			SA1		-38473	-6608	133.917	1202.95
Alaevis	Head	Supralabial6	7	1	Freehand Region	sensilla	dermal_capsule	area	16		SA1	16 CELLS	11693.1	-374.798	135.358	1171.51
Alaevis	Head	Supralabial6	8	0	Freehand Region	sensilla	dermal_capsule	area	9		SA1	9 CENTRAL CELLS	18783.1	-409.966	98.9179	715.387
Alaevis	Head	Supralabial6	3a	52	Ruler	sensilla	cap_cells	length		100	EPS1		-22903	8492	11.0983
Hstokesii	head	nasal_scale	1	5	Ruler	sensilla	epidermis	length		100	EPL1		71895	-9839	17.9655
Hstokesii	head	nasal_scale	14	4	Ruler	sensilla	epidermis	length		100	EPL1		-72565	-1230	39.7319
Hstokesii	head	nasal_scale	20	9	Ruler	sensilla	epidermis	length		100	EPL1		-24210	11901	34.963
Hstokesii	head	nasal_scale	20	22	Ruler	sensilla	epidermis	length		100	EPL1		-24304	10424	59.5218
Hstokesii	head	nasal_scale	26	5	Ruler	sensilla	epidermis	length		100	EPL1		-78417	8982	36.0662
Hstokesii	head	nasal_scale	26	17	Ruler	sensilla	epidermis	length		100	EPL1		-77809	3277	29.3574
Alaevis	Head	Supralabial6	9	0	Freehand Region	sensilla	dermal_capsule	area	11		SA1	11 CELLS	31193.3	527.743	95.3696	685.461
Alaevis	Head	Supralabial6	10	0	Freehand Region	sensilla	dermal_capsule	area	3		SA1	3 CELLS	-8614.07	-177.359	83.4871	518.227
Alaevis	Head	Supralabial6	7	11	Freehand Region	sensilla	dermal_capsule	area	14		SA2	14 CELLS	17474.4	-334.244	127.241	1134.16
Alaevis	Head	Supralabial6	7	21	Freehand Region	sensilla	dermal_capsule	area	16		SA3	16 CELLS	29328.5	-1434.04	126.99	921.833
Alaevis	Head	Supralabial6	3a	108	Freehand Region	sensilla	dermal_capsule	area			SA5		15292	954	178.052	2126.45
Alaevis	Tail	B2	5	5	Ruler	sensilla	dermal_capsule	diameter			CD DIAMETER		-8507.21	1644.44	23.0301
Hstokesii	head	nasal_scale	54	6	Ruler	sensilla	dermal_capsule	diameter			dc diam		-82403	6351	23.678
Alaevis	Head	Supralabial6	3a	93	Ruler	sensilla	dermal_capsule	diameter			DC Diameter		-59221	2549	45.8512
Alaevis	Head	Supralabial6	3a	101	Ruler	sensilla	dermal_capsule	diameter			DC diameter		-22792	8469	20.7381
Alaevis	Head	Supralabial6	3a	105	Ruler	sensilla	dermal_capsule	diameter			DC diameter		19303	-8499	21.0568
Hstokesii	head	nasal_scale	14	26	Ruler	sensilla	epidermis	length		100	S2 EPR1		-24846	7694	25.804
Hstokesii	head	nasal_scale	14	27	Ruler	sensilla	epidermis	length		100	S2 EPL1		-24878	7993	33.9649
Hstokesii	head	nasal_scale	14	29	Ruler	sensilla	epidermis	length		200	S2 EPR2		-24797	7252	26.8553
Hstokesii	head	nasal_scale	14	30	Ruler	sensilla	epidermis	length		300	S2 EPR3		-24695	6823	34.6463
Hstokesii	head	nasal_scale	14	31	Ruler	sensilla	epidermis	length		200	S2 EPL2		-24981	8439	39.3593
Hstokesii	head	nasal_scale	14	32	Ruler	sensilla	epidermis	length		300	S2 EPR3		-24990	8887	39.3771
Alaevis	Head	Supralabial6	3b	8	Ruler	sensilla	dermal_capsule	diameter			DC diameter		54450	7854	15.5577
Alaevis	Head	Supralabial6	1	28	Ruler	sensilla	dermal_capsule	diameter			DC diameter	DC = dermal capsule	-12461	-5383	38.8249
Alaevis	Head	Supralabial6	3a	75	Ruler	sensilla	cap_cells	length		100	EPS1		19217	-8598	12.1665
Hstokesii	head	nasal_scale	35	5	Ruler	sensilla	epidermis	length		100	EPL1		-80531	9091	29.0103
Hstokesii	head	nasal_scale	35	18	Ruler	sensilla	epidermis	length		100	EPL1		73374	1989	45.1748
Hstokesii	head	nasal_scale	40	9	Ruler	sensilla	epidermis	length		100	EPL1		77158	4182	45.9511
Hstokesii	head	nasal_scale	54	8	Ruler	sensilla	epidermis	length		100	EPL1		-82401	6505	30.3407
Alaevis	Head	Supralabial6	3a	25	Ruler	sensilla	epidermis	length		100	EPL1		-59309	2807	37.1617
Alaevis	Head	Supralabial6	3a	45	Ruler	sensilla	epidermis	length		100	EPL1		-93390	-5365	38.1242
Alaevis	Head	Supralabial6	3a	67	Ruler	sensilla	epidermis	length		100	EPL1		-22743	8702	32.8213
Alaevis	Head	Supralabial6	3a	83	Ruler	sensilla	epidermis	length		100	EPL1		19177	-8378	36.6203
Alaevis	Head	Supralabial6	3a	121	Ruler	sensilla	epidermis	length		100	EPL1		15160	1232	30.9727
Alaevis	Head	Supralabial6	3b	20	Ruler	sensilla	epidermis	length		100	EPL1		54411	8090	37.8216
Alaevis	Head	Supralabial6	6	14	Ruler	sensilla	epidermis	length		100	EPL1		-80228	1877	31.3207
Alaevis	Head	Supralabial6	1	1	Ruler	sensilla	epidermis	length		100	EPL1		-12596	-5160	33.6302
Alaevis	Head	Supralabial6	2	1	Ruler	sensilla	epidermis	length		100	EPL1		-38655	-6424	33.1586
Alaevis	Head	Supralabial6	2	33	Ruler	sensilla	epidermis	length		100	EPL1		39660	1938	32.0747
Alaevis	Head	Supralabial6	7	16	Ruler	sensilla	epidermis	length		100	EPL1		17446	-289.642	33.2383
Alaevis	Head	Supralabial6	8	7	Ruler	sensilla	epidermis	length		100	EPL1		18810.9	-454.822	33.9315
Alaevis	Head	Supralabial6	9	7	Ruler	sensilla	epidermis	length		100	EPL1		31166.2	553.916	29.1292
Alaevis	Head	Supralabial6	10	7	Ruler	sensilla	epidermis	length		100	EPL1		-8638.98	-128.116	28.9578
Alaevis	Tail	A22R	3	5	Ruler	sensilla	epidermis	length		100	EPL1		2191.73	4423.94	21.3029
Alaevis	Tail	A22R	6	5	Ruler	sensilla	epidermis	length		100	EPL1		-4353.27	920.236	19.4923
Alaevis	Tail	A22R	7	8	Ruler	sensilla	epidermis	length		100	EPL1		6591.18	-2256.56	25.5909
Hstokesii	head	nasal_scale	30	22	Freehand Region	sensilla	dermal_capsule	area	17		Pit2 Area	17 central cells	-80345	851	116.68	765.029
Alaevis	Head	Supralabial6	3a	112	Ruler	sensilla	cap_cells	length		100	EPS1		15118	951	16.1315
Alaevis	Tail	A22R	8	5	Ruler	sensilla	epidermis	length		100	EPL1		6891.46	-5313.18	23.9825
Alaevis	Tail	A22R	8	10	Ruler	sensilla	epidermis	length		100	EPL1		18946.5	2016.42	20.7843
Alaevis	Tail	A22R	9	2	Ruler	sensilla	epidermis	length		100	EPL1		31480	-5397.16	23.1958
Alaevis	Tail	A22R	28	9	Ruler	sensilla	epidermis	length		100	EPL1		2744.76	-2136.86	19.0581
Alaevis	Tail	A22R	28	14	Ruler	sensilla	epidermis	length		100	EPL1		32235.7	-2120.77	20.2761
Alaevis	Tail	A22R	32	2	Ruler	sensilla	epidermis	length		100	EPL1		29725.1	4644.38	17.5307
Alaevis	Tail	A22R	34	5	Ruler	sensilla	epidermis	length		100	EPL1		-2099.85	1487.14	22.0402
Alaevis	Tail	A22R	35	1	Ruler	sensilla	epidermis	length		100	EPL1		6968.02	4636.74	20.1998
Alaevis	Tail	A22R	37	1	Ruler	sensilla	epidermis	length		100	epl1		6605.2	2188.05	20.6562
Alaevis	Tail	A22R	13	2	Ruler	sensilla	epidermis	length		100	EPL1		-11133.6	-6628.08	29.3173
Alaevis	Tail	B2	5	8	Ruler	sensilla	epidermis	length		100	EPL1		-8483.41	1614.25	26.1039
Hstokesii	head	nasal_scale	1	11	Ruler	sensilla	epidermis	length		200	EPL2		71811	-9390	17.0056
Alaevis	Head	Supralabial6	3b	9	Ruler	sensilla	cap_cells	length			EP1		54320	7832	10.1925
Hstokesii	head	nasal_scale	14	11	Ruler	sensilla	epidermis	length		200	EPL2		-72478	-765	34.7373
Hstokesii	head	nasal_scale	20	11	Ruler	sensilla	epidermis	length		200	EPL2		-24185	12364	33.9194
Hstokesii	head	nasal_scale	26	8	Ruler	sensilla	epidermis	length		200	EPL2		-78313	9422	36.2882
Hstokesii	head	nasal_scale	26	19	Ruler	sensilla	epidermis	length		200	EPL2		-78040	3659	40.9728
Hstokesii	head	nasal_scale	35	9	Ruler	sensilla	epidermis	length		200	EPL2		-80521	9549	29.5815
Alaevis	Head	Supralabial6	6	3	Ruler	sensilla	cap_cells	length		100	EPS1		-80207	1647	17.0291
Hstokesii	head	nasal_scale	35	22	Ruler	sensilla	epidermis	length		200	EPL2		73453	2461	31.4235
Hstokesii	head	nasal_scale	40	11	Ruler	sensilla	epidermis	length		200	EPL2		77134	4631	40.096
Hstokesii	head	nasal_scale	54	11	Ruler	sensilla	epidermis	length		200	EPL2		-82345	6962	32.6023
Alaevis	Head	Supralabial6	3a	27	Ruler	sensilla	epidermis	length		200	EPL2		-59407	3249	31.1847
Alaevis	Head	Supralabial6	1	19	Ruler	sensilla	cap_cells	length		100	EPS1		-12577	-5454	17.4767
Alaevis	Head	Supralabial6	3a	47	Ruler	sensilla	epidermis	length		200	EPL2		-93632	-4968	34.458
Alaevis	Head	Supralabial6	3a	70	Ruler	sensilla	epidermis	length		200	EPL2		-22683	9166	35.1184
Alaevis	Head	Supralabial6	3a	86	Ruler	sensilla	epidermis	length		200	EPL2	New sensilla forming in next 100 um, could only take 2 EP measurements	18951	-7982	31.9322
Alaevis	Head	Supralabial6	3a	123	Ruler	sensilla	epidermis	length		200	EPL2		15076	1670	38.9249
Alaevis	Head	Supralabial6	3b	23	Ruler	sensilla	epidermis	length		200	EPL2		54383	8539	34.1634
Alaevis	Head	Supralabial6	6	17	Ruler	sensilla	epidermis	length		200	EPL2		-80397	2286	27.8393
Alaevis	Head	Supralabial6	1	2	Ruler	sensilla	epidermis	length		200	EPL2		-12839	-4746	34.7229
Alaevis	Head	Supralabial6	2	3	Ruler	sensilla	epidermis	length		200	EPL2		-38892	-6010	37.1826
Alaevis	Head	Supralabial6	2	11	Ruler	sensilla	cap_cells	length		100	EPS1		-38614	-6674	20.7136
Alaevis	Head	Supralabial6	2	36	Ruler	sensilla	epidermis	length		200	EPL2		39460	2370	33.3394
Alaevis	Head	Supralabial6	7	17	Ruler	sensilla	epidermis	length		200	EPL2		17413.9	-193.067	33.6789
Alaevis	Head	Supralabial6	8	8	Ruler	sensilla	epidermis	length		200	EPL2		18831.6	-554.812	33.7679
Alaevis	Tail	A22R	3	6	Ruler	sensilla	epidermis	length		200	EPL2		2260.86	4347.35	23.81
Alaevis	Tail	A22R	6	6	Ruler	sensilla	epidermis	length		200	EPL2		-4341.08	818.357	23.1326
Alaevis	Tail	A22R	7	9	Ruler	sensilla	epidermis	length		200	EPL2		6600.78	-2359.34	26.2252
Alaevis	Tail	A22R	8	6	Ruler	sensilla	epidermis	length		200	EPL2		6881.74	-5416.28	21.3948
Alaevis	Tail	A22R	8	14	Ruler	sensilla	epidermis	length		200	EPL2		18947.7	2118.61	20.729
Alaevis	Head	Supralabial6	2	30	Ruler	sensilla	cap_cells	length		100	EPS1		39677	1720	21.2287
Alaevis	Tail	A22R	9	5	Ruler	sensilla	epidermis	length		200	EPL2		31483	-5500.29	18.4335
Alaevis	Tail	A22R	28	10	Ruler	sensilla	epidermis	length		200	EPL2		2764.3	-2237	18.7192
Alaevis	Tail	A22R	28	18	Ruler	sensilla	epidermis	length		200	EPL2		32261.3	-2219.93	17.7051
Alaevis	Tail	A22R	32	5	Ruler	sensilla	epidermis	length		200	EPL2		29797.9	4572.78	14.2294
Alaevis	Tail	A22R	34	9	Ruler	sensilla	epidermis	length		200	EPL2		-2069.91	1388.69	19.1608
Alaevis	Tail	A22R	35	6	Ruler	sensilla	epidermis	length		200	EPL2		7010.92	4543.62	17.8097
Alaevis	Tail	A22R	37	6	Ruler	sensilla	epidermis	length		200	EPL2		6645.88	2093.69	21.2045
Alaevis	Tail	A22R	13	7	Ruler	sensilla	epidermis	length		200	EPL2		-11228.9	-6575.03	18.7087
Alaevis	Head	Supralabial6	7	4	Ruler	sensilla	cap_cells	length		100	EP 1		11663.4	-388.313	20.7324
Alaevis	Tail	B2	5	13	Ruler	sensilla	epidermis	length		200	EPL2		-8467.4	1512.8	25.8144
Hstokesii	head	nasal_scale	1	13	Ruler	sensilla	epidermis	length		300	EPL3		71507	-8996	37.065
Hstokesii	head	nasal_scale	14	13	Ruler	sensilla	epidermis	length		300	EPL3		-72096	-464	26.1219
Hstokesii	head	nasal_scale	20	12	Ruler	sensilla	epidermis	length		300	EPL3		-24070	12793	49.9526
Hstokesii	head	nasal_scale	26	9	Ruler	sensilla	epidermis	length		300	EPL3		-78153	9842	37.3875
Hstokesii	head	nasal_scale	26	20	Ruler	sensilla	epidermis	length		300	EPL3		-78239	4085	37.0433
Alaevis	Head	Supralabial6	2	54	Ruler	sensilla	dermal_capsule	diameter			DC diameter		-38473	-6611	27.6286
Alaevis	Head	Supralabial6	2	56	Ruler	sensilla	dermal_capsule	diameter			DC Diameter		39809	1716	29.2482
Alaevis	Head	Supralabial6	8	2	Ruler	sensilla	dermal_capsule	diameter			DC S1 Diameter		18784.3	-410.163	25.1475
Alaevis	Head	Supralabial6	9	2	Ruler	sensilla	dermal_capsule	diameter			DC S1 Diameter		31193.6	528.945	29.8808
Alaevis	Head	Supralabial6	7	20	Ruler	sensilla	dermal_capsule	diameter			DC S2 diamter		17474.2	-335.205	34.9112
Alaevis	Head	Supralabial6	7	23	Ruler	sensilla	dermal_capsule	diameter			DC S3 Diameter		29329.1	-1434.11	23.3619
Alaevis	Head	Supralabial6	6	2	Ruler	sensilla	dermal_capsule	diameter			DC1 diameter		-80098	1687	25.5473
Alaevis	Head	Supralabial6	7	3	Ruler	sensilla	dermal_capsule	diameter			DC1 DIAMETER		11690	-377.925	31.301
Alaevis	Head	Supralabial6	3a	96	Ruler	sensilla	dermal_capsule	diameter			DC2 Diameter		-93209	-5557	57.0974
Alaevis	Head	Supralabial6	3a	110	Ruler	sensilla	dermal_capsule	diameter			DC5 diameter		15295	966	39.8058
Alaevis	Head	Supralabial6	1	31	Ruler	sensilla	dermal_capsule	diameter			S diameter		-12564	-5403	92.8357
Alaevis	Head	Supralabial6	7	12	Ruler	sensilla	cap_cells	length			EP S1		17445	-345.143	15.6816
Hstokesii	head	nasal_scale	35	10	Ruler	sensilla	epidermis	length		300	EPL3		-80572	10005	37.8535
Hstokesii	head	nasal_scale	35	23	Ruler	sensilla	epidermis	length		300	EPL3		73482	2925	37.4073
Hstokesii	head	nasal_scale	40	12	Ruler	sensilla	epidermis	length		300	EPL3		77167	5089	36.6505
Alaevis	Head	Supralabial6	3a	29	Ruler	sensilla	epidermis	length		300	EPL3		-59482	3701	36.8764
Alaevis	Head	Supralabial6	3a	49	Ruler	sensilla	epidermis	length		300	EPL3		-93846	-4560	37.0804
Alaevis	Head	Supralabial6	3a	72	Ruler	sensilla	epidermis	length		300	EPL3		-22596	9606	36.6581
Hstokesii	head	nasal_scale	14	2	Ruler	sensilla	dermal_capsule	diameter			S1 DC diam		-72458	-1372	21.1643
Hstokesii	head	nasal_scale	26	2	Ruler	sensilla	dermal_capsule	diameter			S1 DC diam		-78291	8799	32.1616
Hstokesii	head	nasal_scale	35	2	Ruler	sensilla	dermal_capsule	diameter			S1 DC diam		-80493	8825	46.1066
Hstokesii	head	nasal_scale	40	6	Ruler	sensilla	dermal_capsule	diameter			S1 DC diam		77247	3984	25.9688
Alaevis	Head	Supralabial6	7	24	Ruler	sensilla	cap_cells	length		100	S3 EP1		29302.1	-1447.46	19.5262
Hstokesii	head	nasal_scale	1	2	Ruler	sensilla	dermal_capsule	diameter			s1 diameter		71985	-9945	31.6771
Hstokesii	head	nasal_scale	20	6	Ruler	sensilla	dermal_capsule	diameter			S1 diameter		-24146	11676	18.6773
Alaevis	Head	Supralabial6	3a	125	Ruler	sensilla	epidermis	length		300	EPL3		14951	2101	33.11
Alaevis	Head	Supralabial6	3b	25	Ruler	sensilla	epidermis	length		300	EPL3		54360	8986	31.0494
Alaevis	Head	Supralabial6	6	19	Ruler	sensilla	epidermis	length		300	EPL3		-80548	2703	32.0368
Alaevis	Head	Supralabial6	1	3	Ruler	sensilla	epidermis	length		300	EPL3		-13082	-4319	32.7861
Alaevis	Head	Supralabial6	2	4	Ruler	sensilla	epidermis	length		300	EPL3		-39152	-5606	35.6441
Alaevis	Head	Supralabial6	2	42	Ruler	sensilla	epidermis	length		300	EPL3		39269	2794	37.549
Alaevis	Head	Supralabial6	3b	11	Ruler	sensilla	dermal_capsule	diameter			S1 Diameter		54344	7862	82.3596
Alaevis	Head	Supralabial6	3a	95	Ruler	sensilla	dermal_capsule	diameter			S1 diameter		-59351	2565	100.599
Alaevis	Head	Supralabial6	6	5	Ruler	sensilla	dermal_capsule	diameter			S1 diameter		-80234	1654	64.9232
Alaevis	Head	Supralabial6	8	3	Ruler	sensilla	cap_cells	length			EP S1	alpha and beta layers still attached, no thinning	18808.5	-403.687	15.7535
Alaevis	Head	Supralabial6	2	51	Ruler	sensilla	dermal_capsule	diameter			S1 Diameter		-38623	-6673	76.1506
Hstokesii	head	nasal_scale	14	24	Ruler	sensilla	dermal_capsule	diameter			S2 DC diam		-24796	7827	27.4891
Alaevis	Head	Supralabial6	7	30	Ruler	sensilla	epidermis	length		300	EPL3		29213.9	-1204.13	27.9303
Alaevis	Head	Supralabial6	8	9	Ruler	sensilla	epidermis	length		300	EPL3		18848.7	-657.619	31.9207
Alaevis	Head	Supralabial6	9	8	Ruler	sensilla	epidermis	length		300	EPL3		31119.5	647.057	31.7001
Alaevis	Head	Supralabial6	10	9	Ruler	sensilla	epidermis	length		300	EPL3		-8680.89	70.073	29.6223
Alaevis	Tail	A22R	3	7	Ruler	sensilla	epidermis	length		300	EPL3		2327.38	4270.01	19.471
Alaevis	Tail	A22R	6	7	Ruler	sensilla	epidermis	length		300	EPL3		-4318.65	716.097	21.9238
Hstokesii	head	nasal_scale	1	1	Ruler	sensilla					S1 height		71973	-9959	16.4229
Alaevis	Tail	A22R	7	10	Ruler	sensilla	epidermis	length		300	EPL3		6612.41	-2459.05	22.3797
Alaevis	Tail	A22R	8	7	Ruler	sensilla	epidermis	length		300	EPL3		6874.66	-5517.26	16.656
Alaevis	Tail	A22R	8	15	Ruler	sensilla	epidermis	length		300	EPL3		18951.3	2221.06	17.5562
Alaevis	Tail	A22R	9	7	Ruler	sensilla	epidermis	length		300	EPL3		31485.1	-5603.06	18.7873
Alaevis	Tail	A22R	28	11	Ruler	sensilla	epidermis	length		300	EPL3		2787.85	-2335.11	15.8094
Alaevis	Tail	A22R	28	19	Ruler	sensilla	epidermis	length		300	EPL3		32284.7	-2318.86	17.8414
Alaevis	Head	Supralabial6	9	3	Ruler	sensilla	cap_cells	length			EP S1		31172.5	515.377	19.4953
Alaevis	Tail	A22R	32	7	Ruler	sensilla	epidermis	length		300	EPL3		29862.8	4492.75	17.0034
Alaevis	Tail	A22R	34	11	Ruler	sensilla	epidermis	length		300	EPL3		-2042.76	1288.57	19.0672
Alaevis	Tail	A22R	35	7	Ruler	sensilla	epidermis	length		300	EPL3		7049.29	4449.43	16.4106
Alaevis	Tail	A22R	37	7	Ruler	sensilla	epidermis	length		300	EPL3		6675.84	1996.1	20.2261
Alaevis	Tail	A22R	13	9	Ruler	sensilla	epidermis	length		300	EPL3		-11292.7	-6492.33	21.0892
Alaevis	Head	Supralabial6	10	3	Ruler	sensilla	cap_cells	length		100	EPS1	alpha and beta layers above same thickness as surrounding layers	-8635.17	-185.143	15.9751
Alaevis	Tail	B2	5	14	Ruler	sensilla	epidermis	length		300	EPL3		-8453.19	1410.81	19.4565
Alaevis	Head	Supralabial6	7	5	Ruler	sensilla	epidermis	length		100	EPR 1		11691	-429.056	35.9474
Alaevis	Head	Supralabial6	7	13	Ruler	sensilla	epidermis	length		100	EPR 1		17471.4	-380.428	31.388
Alaevis	Head	Supralabial6	8	4	Ruler	sensilla	epidermis	length		100	EPR 1		18790.7	-364.306	31.194
Alaevis	Head	Supralabial6	10	4	Ruler	sensilla	epidermis	length		100	EPR 1		-8616.95	-207.794	35.8805
Alaevis	Tail	A22R	8	8	Ruler	sensilla	cap_cells	length		100	S2 EP1		18943.9	1954.47	45.3589
Alaevis	Head	Supralabial6	7	7	Ruler	sensilla	epidermis	length		200	EPR 2		11725.2	-533.08	33.714
Alaevis	Head	Supralabial6	7	15	Ruler	sensilla	epidermis	length		200	EPR 2		17505.8	-476.317	34.1853
Alaevis	Head	Supralabial6	7	8	Ruler	sensilla	epidermis	length		300	EPR 3		11754.4	-629.739	29.0284
Hstokesii	head	nasal_scale	1	4	Ruler	sensilla	epidermis	length		100	EPR1		72057	-10118	13.642
Hstokesii	head	nasal_scale	14	5	Ruler	sensilla	epidermis	length		100	EPR1		-72441	-1543	39.5188
Hstokesii	head	nasal_scale	20	8	Ruler	sensilla	epidermis	length		100	EPR1		-24181	11498	32.0044
Hstokesii	head	nasal_scale	20	21	Ruler	sensilla	epidermis	length		100	EPR1		-24318	10051	47.2496
Hstokesii	head	nasal_scale	26	4	Ruler	sensilla	epidermis	length		100	EPR1		-78360	8596	28.0324
Hstokesii	head	nasal_scale	26	14	Ruler	sensilla	dermal_capsule	diameter			S2 DC diam		-77734	3149	18.7181
Hstokesii	head	nasal_scale	20	19	Ruler	sensilla	dermal_capsule	diameter			S2 DC diameter		-24276	10222	19.7045
Alaevis	Head	Supralabial6	3a	98	Ruler	sensilla	dermal_capsule	diameter			S2 diameter		-93367	-5613	97.9987
Alaevis	Head	Supralabial6	2	57	Ruler	sensilla	dermal_capsule	diameter			S2 Diameter		39652	1719	74.8276
Alaevis	Tail	A22R	3	0	Ruler	sensilla	cap_cells	length			S1 EP1		2158.84	4486.73	46.0229
Hstokesii	head	nasal_scale	26	16	Ruler	sensilla	epidermis	length		100	EPR1		-77745	3021	30.1721
Hstokesii	head	nasal_scale	35	4	Ruler	sensilla	epidermis	length		100	EPR1		-80608	8645	30.4275
Hstokesii	head	nasal_scale	35	17	Ruler	sensilla	epidermis	length		100	EPR1		73340	1650	42.5762
Hstokesii	head	nasal_scale	40	8	Ruler	sensilla	epidermis	length		100	EPR1		77261	3769	35.5914
Hstokesii	head	nasal_scale	54	9	Ruler	sensilla	epidermis	length		100	EPR1		-82462	6085	32.0962
Alaevis	Head	Supralabial6	3a	97	Ruler	sensilla	dermal_capsule	diameter			SA2 diameter		-93213	-5567	37.1795
Alaevis	Tail	A22R	6	0	Ruler	sensilla	cap_cells	length			S1 EP1		-4353.93	991.139	55.7108
Alaevis	Head	Supralabial6	3a	15	Ruler	sensilla	right	length		100	EPR1		-59225	2321	33.6777
Alaevis	Head	Supralabial6	3a	58	Ruler	sensilla	right	length		100	EPR1		-22820	8253	37.953
Alaevis	Head	Supralabial6	3a	81	Ruler	sensilla	right	length		100	EPR1		19398	-8726	37.675
Alaevis	Head	Supralabial6	3a	114	Ruler	sensilla	right	length		100	EPR1		15282	745	30.0576
Alaevis	Head	Supralabial6	3b	13	Ruler	sensilla	right	length		100	EPR1		54460	7675	37.8283
Hstokesii	head	nasal_scale	54	5	Ruler	sensilla	dermal_capsule	length			DC height		-82406	6347	29.9112
Alaevis	Head	Supralabial6	3a	92	Ruler	sensilla	dermal_capsule	length			DC height		-59208	2561	40.9847
Alaevis	Head	Supralabial6	1	29	Ruler	sensilla	dermal_capsule	length			DC Height		-12460	-5381	38.5571
Alaevis	Head	Supralabial6	2	53	Ruler	sensilla	dermal_capsule	length			DC Height		-38475	-6604	47.1216
Alaevis	Head	Supralabial6	10	2	Ruler	sensilla	dermal_capsule	length			DC S1 Diameter		-8616.17	-177.204	23.729
Alaevis	Head	Supralabial6	7	26	Ruler	sensilla	epidermis	length		200	S3 EP2		29374.7	-1574.79	30.4035
Alaevis	Head	Supralabial6	6	7	Ruler	sensilla	epidermis	length		100	EPR1		-80081	1525	33.8007
Alaevis	Head	Supralabial6	1	9	Ruler	sensilla	epidermis	length		100	EPR1		-12335	-5596	38.5862
Alaevis	Head	Supralabial6	2	20	Ruler	sensilla	epidermis	length		100	EPR1		-38386	-6859	35.7744
Alaevis	Head	Supralabial6	2	44	Ruler	sensilla	epidermis	length		100	EPR1		39838	1518	28.2317
Alaevis	Head	Supralabial6	10	1	Ruler	sensilla	dermal_capsule	length			DC S1 H		-8614.23	-178.527	24.1266
Alaevis	Tail	A22R	8	0	Ruler	sensilla	cap_cells	length			S1 EP1		6896.24	-5248.82	44.3157
Hstokesii	head	nasal_scale	1	3	Ruler	sensilla	cap_cells	length			S1 EP1		71883	-10002	23.934
Hstokesii	head	nasal_scale	54	7	Ruler	sensilla	cap_cells	length			EP1		-82523	6350	20.794
Hstokesii	head	nasal_scale	14	25	Ruler	sensilla	cap_cells	length		100	S2 EP1		-24898	7829	22.868
Hstokesii	head	nasal_scale	20	18	Ruler	sensilla		length			S2 height		-24287	10227	34.2182
Alaevis	Head	Supralabial6	3a	99	Ruler	sensilla		length			S2 height		-93402	-5631	14.7212
Alaevis	Head	Supralabial6	2	58	Ruler	sensilla		length			S2 height		39617	1744	11.5033
Hstokesii	head	nasal_scale	20	20	Ruler	sensilla	cap_cells	length		100	S2 EP1		-24452	10228	38.289
Alaevis	Head	Supralabial6	7	27	Ruler	sensilla	epidermis	length		100	EPR1		29333	-1478.59	38.6687
Alaevis	Head	Supralabial6	9	4	Ruler	sensilla	epidermis	length		100	EPR1		31197.6	489.127	32.4863
Alaevis	Tail	A22R	3	1	Ruler	sensilla	epidermis	length		100	EPR1		2100.28	4525.89	25.0015
Alaevis	Tail	A22R	6	1	Ruler	sensilla	epidermis	length		100	EPR1		-4370.87	1046.79	24.5624
Alaevis	Tail	A22R	7	4	Ruler	sensilla	epidermis	length		100	EPR1		6580.96	-2184.54	30.5085
Alaevis	Head	Supralabial6	7	34	Ruler	sensilla		length			S2 height		17435.5	-342.44	7.91369
Alaevis	Head	Supralabial6	7	33	Ruler	sensilla		length			S2 length		17439.4	-338.806	77.3129
Alaevis	Head	Supralabial6	3a	102	Ruler	sensilla		diameter			S3 diameter		-22887	8504	89.9147
Hstokesii	head	nasal_scale	26	15	Ruler	sensilla	cap_cells	length		100	S2 EP1		-77825	3110	19.7219
Alaevis	Tail	A22R	8	1	Ruler	sensilla	epidermis	length		100	EPR1		6894.98	-5188.78	28.5238
Alaevis	Tail	A22R	8	9	Ruler	sensilla	epidermis	length		100	EPR1		18952.8	1896.91	26.0965
Alaevis	Tail	A22R	9	1	Ruler	sensilla	epidermis	length		100	EPR1		31459.8	-5262.15	18.3598
Alaevis	Tail	A22R	28	4	Ruler	sensilla	epidermis	length		100	EPR1		2711.05	-2048.52	20.4016
Alaevis	Head	Supralabial6	3a	103	Ruler	sensilla		length			S3 height		-22922	8490	12.2729
Alaevis	Head	Supralabial6	7	36	Ruler	sensilla		length			S3 height		29291.3	-1446.52	11.2085
Alaevis	Head	Supralabial6	7	35	Ruler	sensilla		length			S3 length		29296	-1441.44	74.626
Hstokesii	head	nasal_scale	35	16	Ruler	sensilla	cap_cells	length		100	S2 EP1		73296	1814	36.5112
Alaevis	Tail	A22R	28	13	Ruler	sensilla	epidermis	length		100	EPR1		32212.9	-2034.21	17.4245
Alaevis	Tail	A22R	32	1	Ruler	sensilla	epidermis	length		100	EPR1		29657.8	4705.74	14.4986
Alaevis	Tail	A22R	34	4	Ruler	sensilla	epidermis	length		100	EPR1		-2134.16	1566.73	21.1336
Alaevis	Tail	A22R	35	2	Ruler	sensilla	epidermis	length		100	EPR1		6918.13	4734.35	18.0586
Alaevis	Tail	A22R	37	2	Ruler	sensilla	epidermis	length		100	EPR1		6583.23	2285.53	20.4053
Hstokesii	head	nasal_scale	14	3	Ruler	sensilla	cap_cells				S1 EP1		-72620	-1436	28.5097
Alaevis	Tail	A22R	13	1	Ruler	sensilla	epidermis	length		100	EPR1		-10992.7	-6619.98	30.635
Alaevis	Tail	B2	5	7	Ruler	sensilla	epidermis	length		100	EPR1		-8508.69	1686.16	26.1043
Hstokesii	head	nasal_scale	1	7	Ruler	sensilla	epidermis	length		200	EPR2		72221	-10537	15.09
Hstokesii	head	nasal_scale	14	7	Ruler	sensilla	epidermis	length		200	EPR2		-72282	-1979	30.42
Hstokesii	head	nasal_scale	20	13	Ruler	sensilla	epidermis	length		200	EPR2		-24278	11064	51.3663
Hstokesii	head	nasal_scale	20	23	Ruler	sensilla	epidermis	length		200	epr2		-24307	9595	42.0156
Hstokesii	head	nasal_scale	20	7	Ruler	sensilla	cap_cells				S1 EP1		-24291	11684	26.4724
Hstokesii	head	nasal_scale	26	7	Ruler	sensilla	epidermis	length		200	EPR2		-78490	8162	31.9276
Hstokesii	head	nasal_scale	26	21	Ruler	sensilla	epidermis	length		200	EPR2	edge of scle	-77546	2602	19.6092
Hstokesii	head	nasal_scale	35	7	Ruler	sensilla	epidermis	length		200	EPR2		-80686	8204	33.15
Hstokesii	head	nasal_scale	35	20	Ruler	sensilla	epidermis	length		200	EPR2		73277	1194	47.31
Hstokesii	head	nasal_scale	40	14	Ruler	sensilla	epidermis	length		200	EPR2	next measurement couldn't be taken because scale begins to curve	77403	3326	34.9297
Hstokesii	head	nasal_scale	54	12	Ruler	sensilla	epidermis	length		200	EPR2		-82554	5648	37.0605
Alaevis	Head	Supralabial6	3a	106	Ruler	sensilla		diameter			S4 diameter		19182	-8605	53.4439
Alaevis	Head	Supralabial6	3a	107	Ruler	sensilla		length			S4 height		19185	-8641	8.88602
Alaevis	Head	Supralabial6	3a	111	Ruler	sensilla		diameter			S5 diameter		15137	965	89.6075
Hstokesii	head	nasal_scale	35	3	Ruler	sensilla	cap_cells				S1 EP1		-80596	8869	33.5923
Alaevis	Head	Supralabial6	3a	19	Ruler	sensilla	epidermis	length		200	EPR2		-59095	1860	32.8533
Alaevis	Head	Supralabial6	3a	41	Ruler	sensilla	epidermis	length		200	EPR2		-92931	-6166	38.2418
Alaevis	Head	Supralabial6	3a	60	Ruler	sensilla	epidermis	length		200	EPR2		-22852	7802	30.2489
Alaevis	Head	Supralabial6	3a	87	Ruler	sensilla	epidermis	length		200	EPR2	Section ends, could not take EPR3 measurements	19644	-9100	30.9424
Alaevis	Head	Supralabial6	3a	117	Ruler	sensilla	epidermis	length		200	EPR2		15393	313	37.0353
Alaevis	Head	Supralabial6	3b	16	Ruler	sensilla	epidermis	length		200	EPR2		54500	7236	33.5007
Hstokesii	head	nasal_scale	40	7	Ruler	sensilla	cap_cells						77057	3942	45.6669
Alaevis	Head	Supralabial6	6	10	Ruler	sensilla	epidermis	length		200	EPR2		-79914	1109	34.3494
Alaevis	Head	Supralabial6	1	11	Ruler	sensilla	epidermis	length		200	EPR2		-12098	-5982	37.5295
Alaevis	Head	Supralabial6	2	22	Ruler	sensilla	epidermis	length		200	EPR2		-38133	-7253	33.4924
Alaevis	Head	Supralabial6	2	46	Ruler	sensilla	epidermis	length		200	EPR2		40028	1108	29.5006
Alaevis	Head	Supralabial6	8	6	Ruler	sensilla	epidermis	length		200	EPR2		18769.3	-264.724	33.0193
Alaevis	Head	Supralabial6	9	6	Ruler	sensilla	epidermis	length		200	EPR2		31244.7	397.462	32.4915
Alaevis	Head	Supralabial6	3a	127	Ruler	sensilla		length			S5 height		15097	926	20.1977
Alaevis	Head	Supralabial6	10	6	Ruler	sensilla	epidermis	length		200	EPR2		-8590.9	-305.872	35.6832
Alaevis	Tail	A22R	3	3	Ruler	sensilla	epidermis	length		200	EPR2		2029.07	4598.93	18.0563
Alaevis	Tail	A22R	6	3	Ruler	sensilla	epidermis	length		200	EPR2		-4377.77	1148.23	20.6902
Alaevis	Tail	A22R	7	6	Ruler	sensilla	epidermis	length		200	EPR2		6567.63	-2083.92	25.5962
Alaevis	Tail	A22R	8	3	Ruler	sensilla	epidermis	length		200	EPR2		6880.65	-5079.68	20.9159
Alaevis	Tail	A22R	8	12	Ruler	sensilla	epidermis	length		200	EPR2		18960.8	1792.5	22.4888
Alaevis	Head	Supralabial6	8	1	Ruler	sensilla	dermal_capsule	length			DC S1 Height		18783.1	-409.966	33.3623
Alaevis	Tail	A22R	9	3	Ruler	sensilla	epidermis	length		200	EPR2		31441.7	-5160.7	22.0213
Alaevis	Tail	A22R	28	6	Ruler	sensilla	epidermis	length		200	EPR2		2659.34	-1962.19	17.5565
Alaevis	Tail	A22R	28	16	Ruler	sensilla	epidermis	length		200	EPR2		32194.2	-1933.11	16.966
Alaevis	Tail	A22R	32	8	Ruler	sensilla	epidermis	length		200	EPR2		29574.3	4773.45	18.5879
Alaevis	Tail	A22R	34	7	Ruler	sensilla	epidermis	length		200	EPR2		-2178.33	1658.06	20.4523
Alaevis	Tail	A22R	35	4	Ruler	sensilla	epidermis	length		200	EPR2		6865.49	4821.58	19.548
Alaevis	Head	Supralabial6	9	1	Ruler	sensilla	dermal_capsule	length			DC S1 Height		31193.7	529.458	27.2041
Alaevis	Head	Supralabial6	7	19	Ruler	sensilla	dermal_capsule	length			DC S2 height		17474.4	-334.419	41.7673
Alaevis	Head	Supralabial6	7	22	Ruler	sensilla	dermal_capsule	length			DC S3 Height		29329.3	-1433.68	37.7661
Alaevis	Tail	A22R	37	4	Ruler	sensilla	epidermis	length		200	EPR2		6549.4	2381.74	20.3768
Alaevis	Tail	A22R	13	4	Ruler	sensilla	epidermis	length		200	EPR2		-10891.1	-6607.38	28.8601
Alaevis	Tail	B2	5	10	Ruler	sensilla	epidermis	length		200	EPR2		-8564.89	1771.16	20.8998
Hstokesii	head	nasal_scale	1	9	Ruler	sensilla	epidermis	length		300	EPR3		72490	-10900	14.9376
Hstokesii	head	nasal_scale	14	9	Ruler	sensilla	epidermis	length		300	EPR3		-72281	-2439	40.1362
Hstokesii	head	nasal_scale	20	24	Ruler	sensilla	epidermis	length		300	EPR3		-24310	9157	41.1786
Alaevis	Head	Supralabial6	3b	7	Ruler	sensilla	dermal_capsule	length			DC1 height		54456	7867	49.8043
Hstokesii	head	nasal_scale	26	11	Ruler	sensilla	epidermis	length		300	EPR3		-78506	7700	36.5376
Hstokesii	head	nasal_scale	26	23	Ruler	sensilla	epidermis	length		300	EPR3		-77054	2687	27.4383
Hstokesii	head	nasal_scale	35	8	Ruler	sensilla	epidermis	length		300	EPR3		-80720	7749	38.9237
Hstokesii	head	nasal_scale	35	21	Ruler	sensilla	epidermis	length		300	EPR3		73298	744	42.4608
Alaevis	Head	Supralabial6	3a	22	Ruler	sensilla	epidermis	length		300	EPR3		-58959	1436	32.784
Alaevis	Head	Supralabial6	3a	43	Ruler	sensilla	epidermis	length		300	EPR3		-92694	-6539	36.6776
Alaevis	Head	Supralabial6	6	1	Ruler	sensilla	dermal_capsule	length			DC1 Height		-80098	1685	32.0496
Alaevis	Head	Supralabial6	3a	62	Ruler	sensilla	epidermis	length		300	EPR3		-22836	7355	32.7794
Alaevis	Head	Supralabial6	3a	119	Ruler	sensilla	epidermis	length		300	EPR3		15513	-119	39.4936
Alaevis	Head	Supralabial6	3b	18	Ruler	sensilla	epidermis	length		300	EPR3		54595	6803	33.2274
Alaevis	Head	Supralabial6	1	12	Ruler	sensilla	epidermis	length		300	EPR3		-11872	-6392	33.214
Alaevis	Head	Supralabial6	2	24	Ruler	sensilla	epidermis	length		300	EPR3		-37875	-7620	32.0579
Alaevis	Head	Supralabial6	2	48	Ruler	sensilla	epidermis	length		300	EPR3		40254	720	33.6117
Alaevis	Head	Supralabial6	7	2	Ruler	sensilla	dermal_capsule	length			DC1 Height		11691.8	-377.427	37.4202
Alaevis	Head	Supralabial6	2	55	Ruler	sensilla	dermal_capsule	length			DC2 Height		39817	1712	38.1109
Alaevis	Head	Supralabial6	3a	100	Ruler	sensilla	dermal_capsule	length			DC3 Height		-22771	8467	44.387
Alaevis	Tail	A22R	3	4	Ruler	sensilla	epidermis	length		300	EPR3		1957.69	4671.57	18.2536
Alaevis	Tail	A22R	6	4	Ruler	sensilla	epidermis	length		300	EPR3		-4386.94	1251.65	16.9381
Alaevis	Tail	A22R	7	7	Ruler	sensilla	epidermis	length		300	EPR3		6554.6	-1983.79	20.2079
Alaevis	Tail	A22R	8	4	Ruler	sensilla	epidermis	length		300	EPR3		6867.01	-4978.95	17.39
Alaevis	Tail	A22R	8	13	Ruler	sensilla	epidermis	length		300	EPR3		18961.3	1690.35	16.7531
Alaevis	Tail	A22R	9	4	Ruler	sensilla	epidermis	length		300	epr3		31429.7	-5059.18	18.0195
Alaevis	Head	Supralabial6	3a	104	Ruler	sensilla	dermal_capsule	length			DC4 height		19310	-8498	46.6128
Alaevis	Tail	A22R	28	8	Ruler	sensilla	epidermis	length		300	EPR3		2628.84	-1864.08	16.5702
Alaevis	Tail	A22R	28	17	Ruler	sensilla	epidermis	length		300	EPR3		32171.5	-1834.71	19.2751
Alaevis	Tail	A22R	32	4	Ruler	sensilla	epidermis	length		300	EPR3		29493.8	4824.79	17.635
Alaevis	Tail	A22R	34	8	Ruler	sensilla	epidermis	length		300	EPR3		-2225.9	1748.74	16.8922
Alaevis	Tail	A22R	35	5	Ruler	sensilla	epidermis	length		300	EPR3		6812.3	4908.93	16.6094
Alaevis	Tail	A22R	37	5	Ruler	sensilla	epidermis	length		300	EPR3		6514.71	2477.42	18.0871
Alaevis	Head	Supralabial6	3a	109	Ruler	sensilla	dermal_capsule	length			DC5 Height		15296	967	60.7147
Alaevis	Tail	A22R	13	5	Ruler	sensilla	epidermis	length		300	EPR3		-10791.9	-6589.37	27.4713
Alaevis	Tail	B2	5	11	Ruler	sensilla	epidermis	length		300	EPR3		-8602.83	1867.17	21.5448
Alaevis	Head	Supralabial6	3a	14	Ruler	sensilla	epidermis	length			EPSL		-59352	2672	26.7272
Alaevis	Head	Supralabial6	3a	34	Ruler	sensilla	epidermis	length			EPSL		-93383	-5527	28.5818
Alaevis	Head	Supralabial6	3a	54	Ruler	sensilla	epidermis	length			EPSL		-22868	8568	21.7586
Alaevis	Head	Supralabial6	3a	79	Ruler	sensilla	epidermis	length			EPSL		19183	-8517	15.0086
Hstokesii	head	nasal_scale	14	1	Ruler	sensilla	dermal_capsule	length			S1 DC height		-72477	-1375	38.9501
Alaevis	Head	Supralabial6	1	20	Ruler	sensilla	epidermis	length			EPSL		-12608	-5346	24.6167
Alaevis	Head	Supralabial6	2	12	Ruler	sensilla	epidermis	length			EPSL		-38636	-6574	28.0768
Alaevis	Head	Supralabial6	2	32	Ruler	sensilla	epidermis	length			EPSL		39688	1809	28.9904
Alaevis	Head	Supralabial6	3a	13	Ruler	sensilla	epidermis	length			EPSR		-59328	2476	22.944
Alaevis	Head	Supralabial6	3a	33	Ruler	sensilla	epidermis	length			EPSR		-93295	-5696	22.957
Alaevis	Head	Supralabial6	3a	55	Ruler	sensilla	epidermis	length			EPSR		-22880	8391	18.8854
Hstokesii	head	nasal_scale	26	1	Ruler	sensilla	dermal_capsule	length			S1 DC height		-78297	8805	27.4389
Hstokesii	head	nasal_scale	35	1	Ruler	sensilla	dermal_capsule	length			S1 DC height		-80465	8824	22.9371
Hstokesii	head	nasal_scale	40	5	Ruler	sensilla	dermal_capsule	length			S1 DC height		77238	3990	33.7574
Hstokesii	head	nasal_scale	14	23	Ruler	sensilla	dermal_capsule	length			S2 DC height		-24799	7845	21.3051
Hstokesii	head	nasal_scale	26	13	Ruler	sensilla	dermal_capsule	length			S2 DC height		-77736	3152	22.8258
Alaevis	Head	Supralabial6	1	30	Ruler	sensilla	dermal_capsule	length			SA height		-12601	-5450	23.7908
Alaevis	Head	Supralabial6	3a	77	Ruler	sensilla	epidermis	length			EPSR		19270	-8644	18.6493
Alaevis	Head	Supralabial6	1	21	Ruler	sensilla	epidermis	length			EPSR		-12499	-5515	18.3606
Alaevis	Head	Supralabial6	2	13	Ruler	sensilla	epidermis	length			EPSR		-38530	-6744	23.4418
Alaevis	Head	Supralabial6	2	31	Ruler	sensilla	epidermis	length			EPSR		39735	1630	15.0412
Alaevis	Head	Supralabial6	3a	38	Ruler	sensilla	epidermis	length		100	EPSR1		-93158	-5774	39.544
Alaevis	Head	Supralabial6	6	12	Ruler	sensilla	epidermis	length		300	ER3		-79754	698	32.56
Alaevis	Tail	A22R	34	1	Ruler	unknown	dermal_capsule	length			CD Height		-2127.26	1517.77	27.4533
Alaevis	Tail	A22R	7	2	Ruler	unknown	dermal_capsule	diameter			DC diameter		6575.71	-2218.66	26.8765
Alaevis	Tail	A22R	34	2	Ruler	unknown	dermal_capsule	diameter			DC Diameter		-2127.26	1519.39	22.9803
Alaevis	Tail	A22R	7	1	Ruler	unknown	dermal_capsule	length			DC height		6577.27	-2218.08	26.287
Alaevis	Tail	B2	5	4	Ruler	unknown	dermal_capsule	length			DC HEIGHT		-8507.68	1643.87	23.9415
Alaevis	Tail	A22R	34	0	Freehand Region	unknown	dermal_capsule	area	8		DC UNK	8 CELLS	-2129.61	1516.01	108.553	696.655
Alaevis	Tail	B2	5	3	Freehand Region	unknown	dermal_capsule	area	11		DC UNK	11 CELLS	-8507.67	1643.53	81.0669	494.608
Alaevis	Tail	A22R	28	0	Freehand Region	unknown	dermal_capsule	area	8		DC UNK 1	AREA 8 CELLS	2716.01	-2100.72	81.6596	462.687
Alaevis	Tail	A22R	28	3	Ruler	unknown	dermal_capsule	diameter			DC UNK diameter		2718.24	-2100.21	23.3881
Alaevis	Tail	A22R	28	2	Ruler	unknown	dermal_capsule	length			DC UNK Height		2716.42	-2102.44	20.2227
Alaevis	Tail	A22R	7	0	Freehand Region	unknown	dermal_capsule	area	13		DC UNK1	13 CENTRAL CELLS	6577.07	-2218.28	94.2978	615.019
Hstokesii	head	nasal_scale	20	35	Ruler	unknown	epidermis	length		100	P EPL1		-22736	-3859	32.7812
Hstokesii	head	nasal_scale	20	40	Ruler	unknown	epidermis	length			P EPL2		-22836	-3430	36.9406
Hstokesii	head	nasal_scale	20	34	Ruler	unknown	epidermis	length		100	P EPR1		-22546	-4114	32.4149
Hstokesii	head	nasal_scale	30	9	Freehand Region	unknown	dermal_capsule	area			Pit DC area	5 central cells	22714	-6478	93.8149	618.05
Hstokesii	head	nasal_scale	20	37	Ruler	unknown	epidermis	length			P EPR2		-22530	-4577	34.3797
Hstokesii	head	nasal_scale	30	10	Ruler	unknown	dermal_capsule	length			P DC Height		22715	-6481	21.2873
Hstokesii	head	nasal_scale	20	39	Ruler	unknown	epidermis	length			P EPR3		-22312	-4973	29.9894
Hstokesii	head	nasal_scale	30	11	Ruler	unknown	dermal_capsule	diameter			P DC diameter		22715	-6484	33.0228
Hstokesii	head	nasal_scale	10	9	Ruler	unknown	dermal_capsule	diameter			P1 DC diam		69068	2384	19.6095
Hstokesii	head	nasal_scale	10	8	Ruler	unknown	dermal_capsule	length			P1 DC height		69073	2386	24.7435
Hstokesii	head	nasal_scale	10	5	Ruler	unknown	cap_cells	length			P1 EP1		68942	2377	30.0358
Hstokesii	head	nasal_scale	10	7	Ruler	unknown	epidermis	length			P1 EPL1		68963	2579	36.5613
Hstokesii	head	nasal_scale	10	13	Ruler	unknown	epidermis	length			P1 EPL2		68934	3025	29.495
Hstokesii	head	nasal_scale	10	14	Ruler	unknown	epidermis	length			P1 EPL3		68971	3468	23.7229
Hstokesii	head	nasal_scale	10	6	Ruler	unknown	epidermis	length			P1 EPR1		68985	2171	33.8249
Hstokesii	head	nasal_scale	10	11	Ruler	unknown	epidermis	length			P1 EPR2		68866	1717	42.0361
Hstokesii	head	nasal_scale	10	12	Ruler	unknown	epidermis	length			P1 EPR3		68913	1276	32.33
Hstokesii	head	nasal_scale	30	12	Ruler	unknown	cap_cells	length			P EP1		22634	-6556	20.9789
Hstokesii	head	nasal_scale	30	13	Ruler	unknown	epidermis	length		100	P EPR1		22755	-6678	24.4416
Hstokesii	head	nasal_scale	30	14	Ruler	unknown	epidermis	length		100	P EPL1		22530	-6356	26.4026
Hstokesii	head	nasal_scale	30	16	Ruler	unknown	epidermis	length			P EPR2		22774	-7127	28.8628
Hstokesii	head	nasal_scale	30	18	Ruler	unknown	epidermis	length			P EPR3		23035	-7499	25.0276
Hstokesii	head	nasal_scale	26	3	Ruler	unknown	cap_cells	length			S1 EP1		-78402	8774	20.095
Hstokesii	head	nasal_scale	30	20	Ruler	unknown	epidermis	length			P EPL2		22403	-5932	24.1094
Hstokesii	head	nasal_scale	30	21	Ruler	unknown	epidermis	length			P EPL3		22181	-5564	30.9502
Hstokesii	head	nasal_scale	30	23	Ruler	unknown	cap_cells	length			P2 EP1		-80427	809	25.9337
Hstokesii	head	nasal_scale	30	24	Ruler	unknown	epidermis	length			P2 EPR1		-80371	686	27.5723
Hstokesii	head	nasal_scale	30	25	Ruler	unknown	epidermis	length		100	P EPR1		-80481	958	34.4622
Hstokesii	head	nasal_scale	30	27	Ruler	unknown	epidermis	length			P2 EPR2		-80428	237	41.4178
Hstokesii	head	nasal_scale	30	29	Ruler	unknown	epidermis	length			P2 EP3		-80308	-200	39.0008
Hstokesii	head	nasal_scale	30	30	Ruler	unknown	epidermis	length			P2 EPL2		-80549	1399	38.7361
Hstokesii	head	nasal_scale	30	31	Ruler	unknown	epidermis	length			P2 EPL3		-80593	1838	34.6674
Hstokesii	head	nasal_scale	20	30	Freehand Region	unknown	dermal_capsule	area			Pit DC		-22582	-3950	119.876	845.426
Hstokesii	head	nasal_scale	20	32	Ruler	unknown	dermal_capsule	diameter			Pit DC diamter		-22582	-3949	42.3941
Hstokesii	head	nasal_scale	20	31	Ruler	unknown	dermal_capsule	length			Pit DC height		-22576	-3941	17.9588
Hstokesii	head	nasal_scale	20	33	Ruler	unknown	cap_cells	length			Pit EP1		-22673	-3998	27.6797
Hstokesii	head	nasal_scale	10	4	Freehand Region	unknown	dermal_capsule	area			Pit1 DC area	6 central cells	69066	2394	89.1665	549.416
Alaevis	Tail	A22R	7	3	Ruler	unknown	cap_cells	length			EP1		6597.39	-2215.16	11.9172
Alaevis	Tail	A22R	34	3	Ruler	unknown	cap_cells	length			UNK EP1		-2109.24	1528.18	8.95244
Alaevis	Tail	A22R	28	1	Ruler	unknown	cap_cells	length			UNK EP1		2732.33	-2096.16	9.53108
Alaevis	Tail	B2	5	6	Ruler	unknown	cap_cells	length			EP UNK1		-8488.6	1653.41	17.2637
Hstokesii	head	nasal_scale	30	44	Ruler	unknown	dermal_capsule	length			Pit2		-80334	866	17.5903
Hstokesii	head	nasal_scale	30	45	Ruler	unknown	dermal_capsule	diameter			Pit2		-80344	850	47.1066

## Sheet: Table S1
Table S1. Comparisons of scale organs found in the cephalic skin in Aipysurus laevis and Hydrophis stokesii, and tail skin of Aipysurus laevis. Measurements of height, diameter and ratio of height to diameter are in microns.
Refer to text for descriptions of sensilla, dermal capsule, cap cells and Pacinian-like corpuscles.
Ultrastructural evidence of a mechanosensory function of scale ‘sensilla’ in sea snakes (Hydrophiinae)
Jenna M. Crowe-Riddell, Ruth Williams, Lucille Chapuis, Kate L. Sanders
	H. stokesii	A.laevis
Pacinian	Head	Head
min depth	61.1838	52.5675
max depth	123.612	168.238
Mean depth	93.0144	117.789
standard deviation	19.4759	36
Mean diam	22.167	24.7361
S.D.	11.542	4.93024
Mean length	28.872	36.6557
S.D.	14.4767	25.8477
No. of organs	23	11
Ratio length:diameter	1	1
	1.30248	1.48187
Head scale sensilla
Dermal capsule	Head	Head
Mean diam	26.5345	44.1419
S.D.	8.49108	25.0693
Mean length	28.1608	38.0888
S.D.	6.50726	10.1509
Ratio length:diameter	1	1
	0.94225	1.15892
Mean # of cells	9.27273	11.5
S.D.	4.24478	5.00999
No. of sensilla	12	16
Cap cells	Head	Head
Mean length	28.7686	16.8292
S.D.	8.62324	3.51157
cap cells / epidermis	0.829863	0.528324
% thinner than epidermis	0.170137	0.471676
Epidermis (adjacent to sensilla)	Head	Head
Mean length	34.6667	31.8539
S.D.	8.93776	5.0968
Tail sensilla
Cap cells	Tail	Tail
Mean length	NA	47.8521
S.D.	NA	5.28607
cap cells-epidermis	NA	27.1775
% thicker than epidermis	NA	0.567948
tail cap cells-head cap cells	NA	31.0229
% thicker than head cap cells	NA	0.648308
No. of sensilla	NA	4
Epidermis (adjacent to sensilla)
Mean length	NA	20.6746
S.D.	NA	3.67773
Unknown organs
Dermal capsule	Head	Tail
Mean diam	35.5332	24.0688
S.D.	12.1227	1.88063
Mean length	20.395	24.4762
S.D.	3.34198	3.1896
Ratio length:diameter	1	1
	1.74225	0.983355
Mean # of cells	9.5	10
S.D.	5.44671	2.44949
No. of organs	3	5
Cap cells
Mean length	26.157	11.3234
S.D.	3.83953	3.53891
cap cells / epidermis	0.75453	0.547696
% thinner than epidermis	0.24547	0.452304
	-2.61155	-5.5058
% thinner than sensilla cap cells
